# Supplementary material for: Diverse structures and adsorption properties of quasi-Werner-type copper(ii) complexes with flexible and polar axial bonds
Source: Royal Society of Chemistry journal article supplement (doi:10.1039/c0dt01129k), 2011-01-01
Supplement: c0dt01129k.pdf [file c0dt01129k.pdf]

## Electronic Supplementary Information

### Diverse structures and adsorption properties of quasi-Werner-type copper(II) complexes with flexible and polar axial bonds

Shin-ichiro Noro,<sup>\*a,b</sup> Tomonori Ohba,<sup>c</sup> Katsuo Fukuhara,<sup>b</sup> Yukiko Takahashi,<sup>a</sup> Tomoyuki Akutagawa,<sup>d</sup> and Takayoshi Nakamura<sup>\*a,b</sup>

<sup>a</sup> Research Institute for Electronic Science, Hokkaido University, Sapporo 001-0020, Japan

Fax: +81-11-706-9420; Tel: +81-11-706-9418

E-mail: [noro@es.hokudai.ac.jp](mailto:noro@es.hokudai.ac.jp) & [tnaka@es.hokudai.ac.jp](mailto:tnaka@es.hokudai.ac.jp)

<sup>b</sup> Graduate School of Environmental Earth Science, Hokkaido University, Sapporo 060-0810, Japan

<sup>c</sup> Graduate School of Science, Chiba University, 1-33 Yayoi, Inage, Chiba 263-8522, Japan

<sup>d</sup> Institute for Multidisciplinary Research for Advanced Materials (IMRAS), Tohoku University, 1-1 Katahira, Aoba-ku, Sendai 980-8577, Japan

#### Experimental Section

**SEM.** Scanning electron microscopy (SEM) observations were performed with a JEOL Model JSM-6510 SEM system operating at 1 kV. Dried samples were deposited on carbon tape.

**Table S1.** Selected Bond Distances (Å) for  $\alpha$ -[Cu(PF<sub>6</sub>)<sub>2</sub>(4-mepy)<sub>4</sub>] ( $\alpha$ -1) and {[Ni(4-mepy)<sub>4</sub>]·2PF<sub>6</sub>}.

| $\alpha$ -1                                    |           |            |           |
|------------------------------------------------|-----------|------------|-----------|
| P(1)–F(1) <sup>a</sup>                         | 1.632(2)  | P(1)–F(2)  | 1.598(2)  |
| P(1)–F(3)                                      | 1.570(3)  | P(1)–F(4)  | 1.581(3)  |
| P(1)–F(5)                                      | 1.575(2)  | P(1)–F(6)  | 1.571(2)  |
| P(2)–F(7) <sup>a</sup>                         | 1.622(2)  | P(2)–F(8)  | 1.572(2)  |
| P(2)–F(9)                                      | 1.588(3)  | P(2)–F(10) | 1.580(2)  |
| P(2)–F(11)                                     | 1.509(2)  | P(2)–F(12) | 1.564(2)  |
| P(3)–F(13) <sup>a</sup>                        | 1.627(2)  | P(3)–F(14) | 1.581(2)  |
| P(3)–F(15)                                     | 1.582(2)  | P(3)–F(16) | 1.591(2)  |
| P(3)–F(17)                                     | 1.589(3)  | P(3)–F(18) | 1.583(2)  |
| P(4)–F(19) <sup>a</sup>                        | 1.630(2)  | P(4)–F(20) | 1.587(2)  |
| P(4)–F(21)                                     | 1.579(2)  | P(4)–F(22) | 1.578(2)  |
| P(4)–F(23)                                     | 1.579(3)  | P(4)–F(24) | 1.585(3)  |
| {[Ni(4-mepy) <sub>4</sub> ]·2PF <sub>6</sub> } |           |            |           |
| P–F(1) <sup>a</sup>                            | 1.588(8)  | P–F(2)     | 1.556(9)  |
| P–F(3)                                         | 1.567(11) | P–F(4)     | 1.466(12) |
| P–F(5)                                         | 1.593(13) | P–F(6)     | 1.543(9)  |

<sup>a</sup> These F atoms are located on the axial sites of each metal ion.

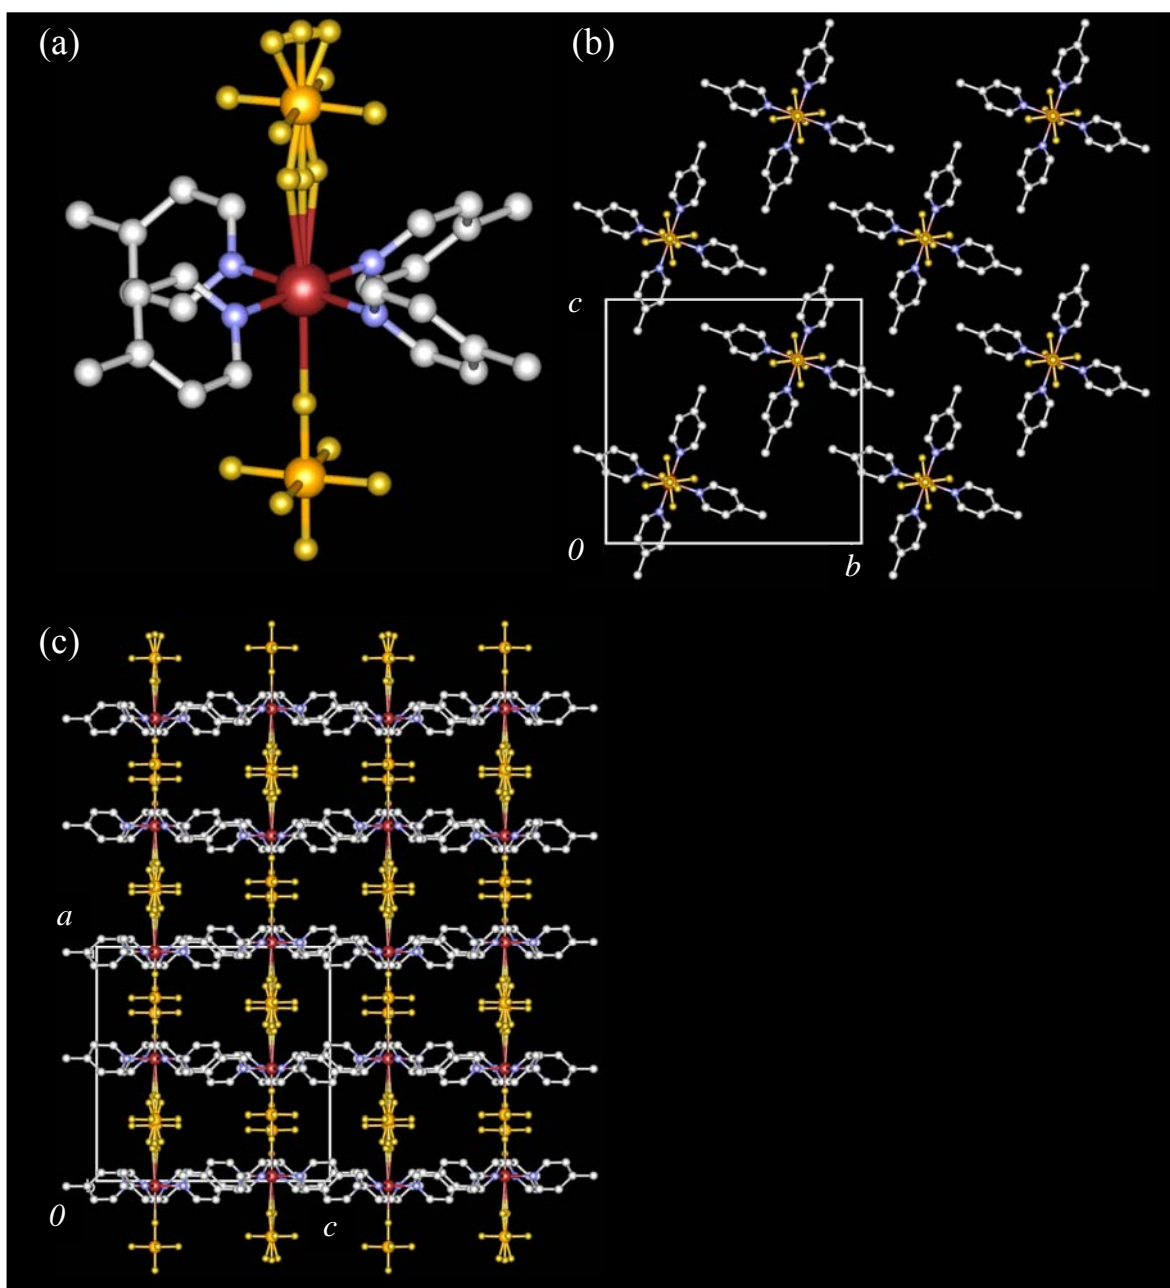

**Fig. S1.** Crystal structure of  $\gamma$ -1D<sub>2</sub>benzene: (a) the molecular structures, (b) the sheet arrangement in the projection along the *a*-axis, and (c) the packing view in the projection along the *b*-axis. The hydrogen atoms and benzene guests are omitted for clarity.

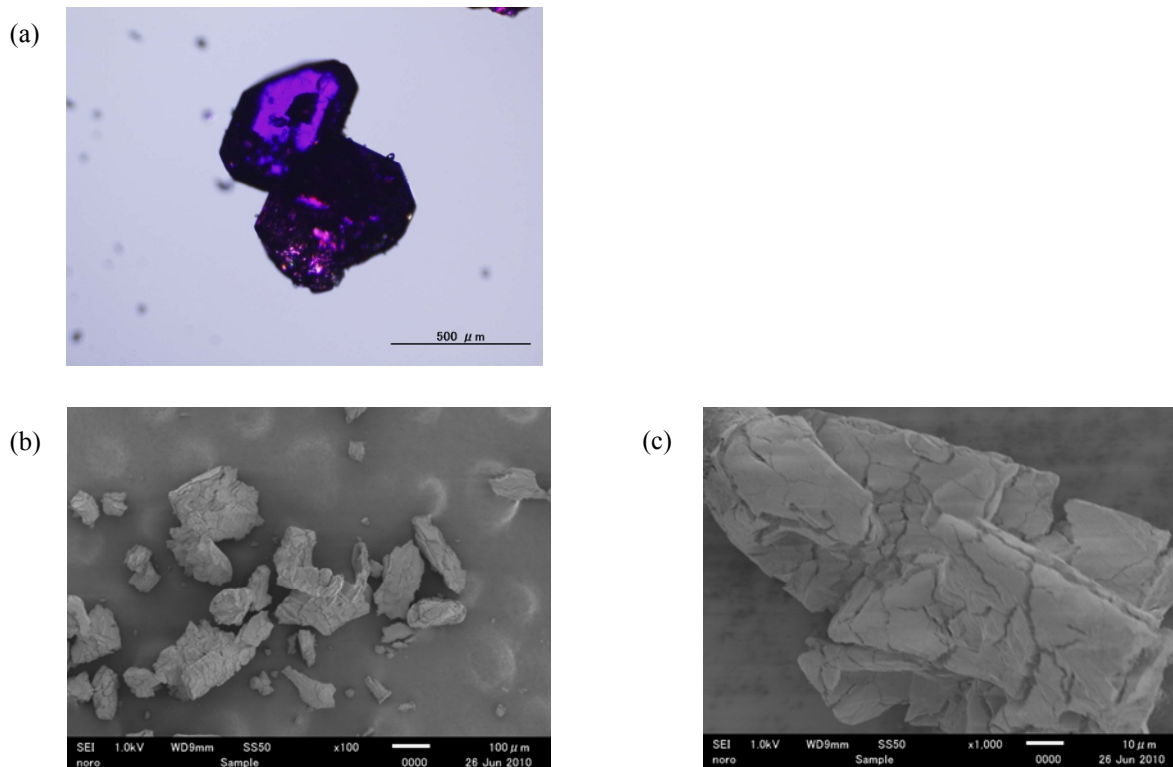

**Fig. S2.** Morphology of crystals in (a, optical microscope image)  $\alpha$ -1 and (b and c, SEM images)  $\alpha$ -1'.

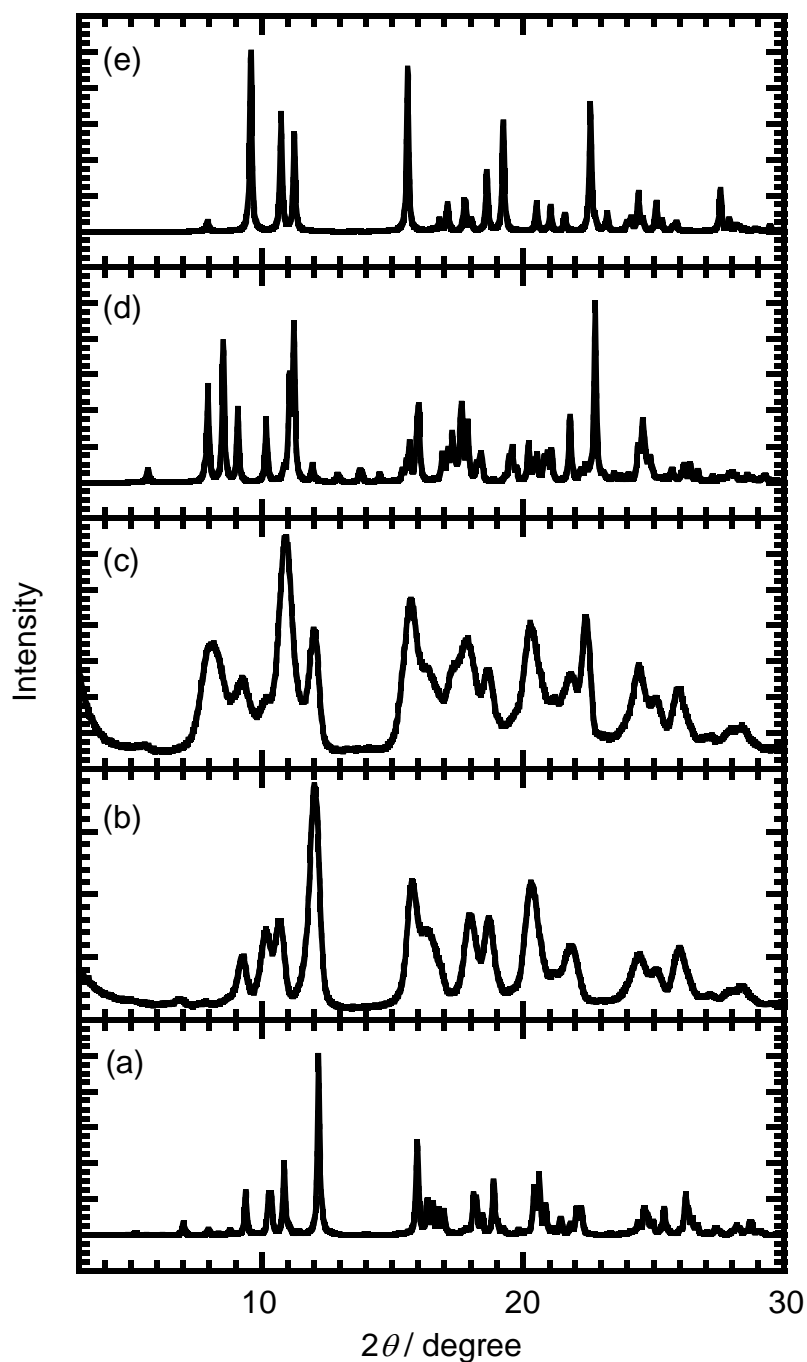

**Fig. S3.** XRD patterns of (a) simulated  $\alpha$ -1 from single-crystal analysis, (b)  $\alpha$ -1', (c)  $\gamma$ -1 $\rightarrow$ 2benzene, which was obtained by an exposure of  $\alpha$ -1 to a benzene vapor for 4 hours, and (d and e) simulated  $\gamma$ -1 $\rightarrow$ 0.5H<sub>2</sub>O $\cdot$ 2benzene (d) and  $\gamma$ -1 $\rightarrow$ 2benzene (e) from single-crystal analysis. During the XRD measurement of  $\gamma$ -1 $\rightarrow$ 2benzene, some guest benzene molecules may be removed from the sample, which is the reason why the XRD pattern of  $\gamma$ -1 $\rightarrow$ 2benzene is not consistent with that of simulated  $\gamma$ -1 $\rightarrow$ 2benzene from single-crystal analysis.

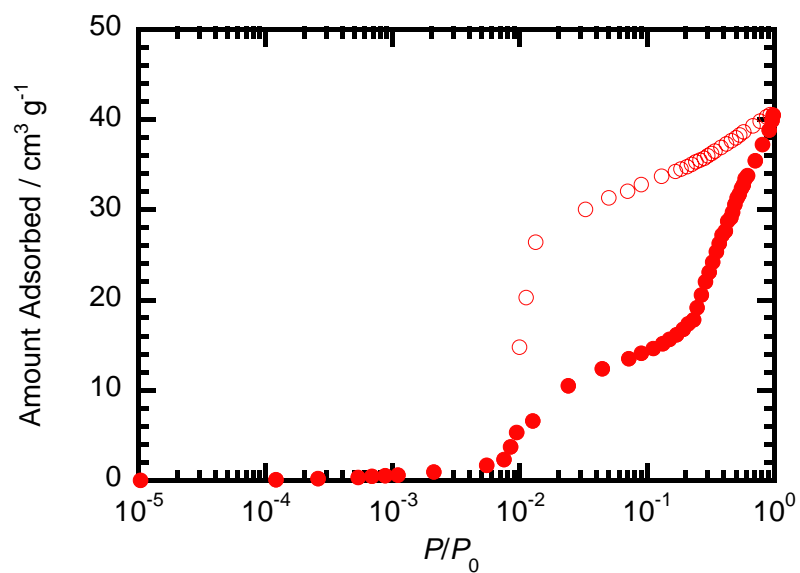

**Fig. S4.** Adsorption (filled symbols) and desorption (open symbols) isotherms for CO<sub>2</sub> gas in  $\alpha$ -1' at 195 K plotted against a logarithmic relative pressure.
